# Supplementary material
Source: MDPI journal article supplement (https://www.mdpi.com/2073-4395/10/12/1910)
Supplement: s1 [file s1]

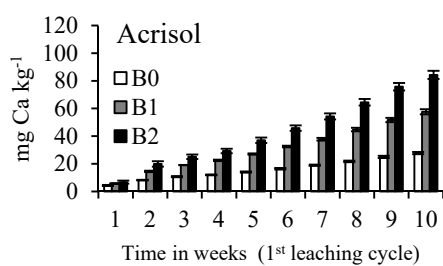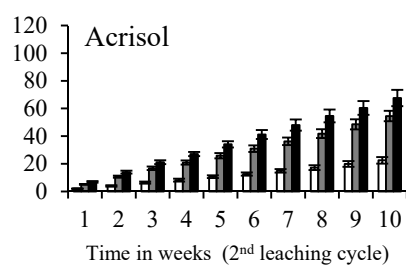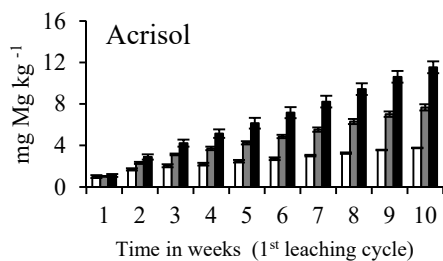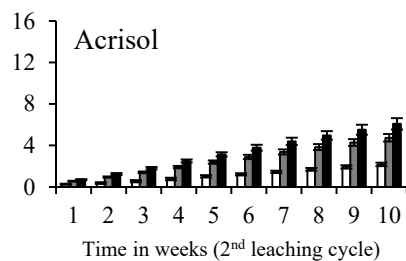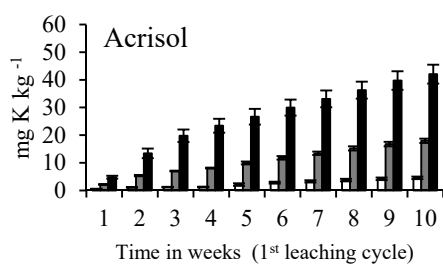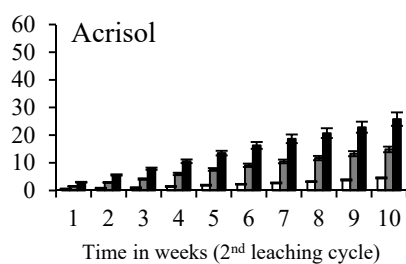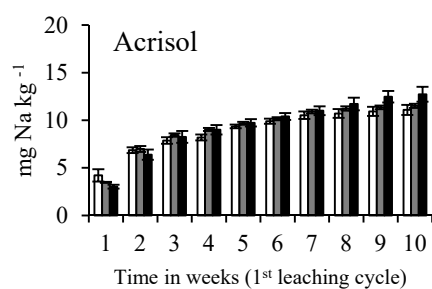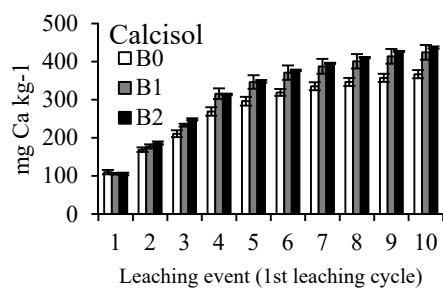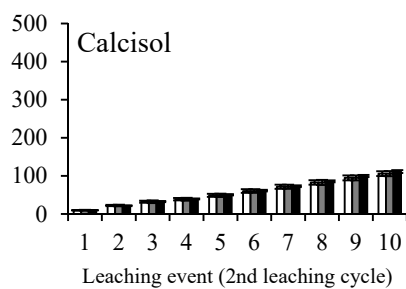

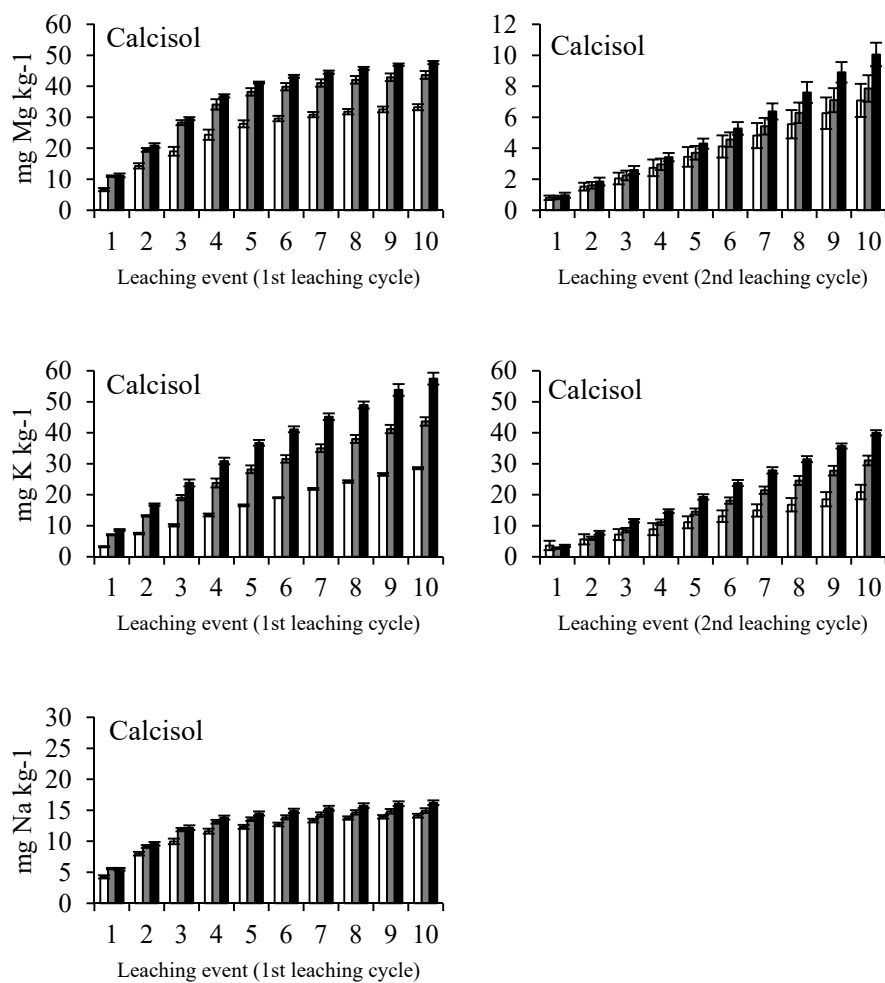

**Figure S1:** Cumulative leaching losses of Ca, Mg, K and Na from Acrisol and Calcisol. Bars indicate standard error of the mean (n=4).
